# Supplementary material for: Lignin Degradation and Its Use in Signaling Development by the Coprophilous Ascomycete Podospora anserina
Source: MDPI journal article supplement (doi:10.3390/jof6040278), 2020-11-11
Supplement: s1 [file s1]

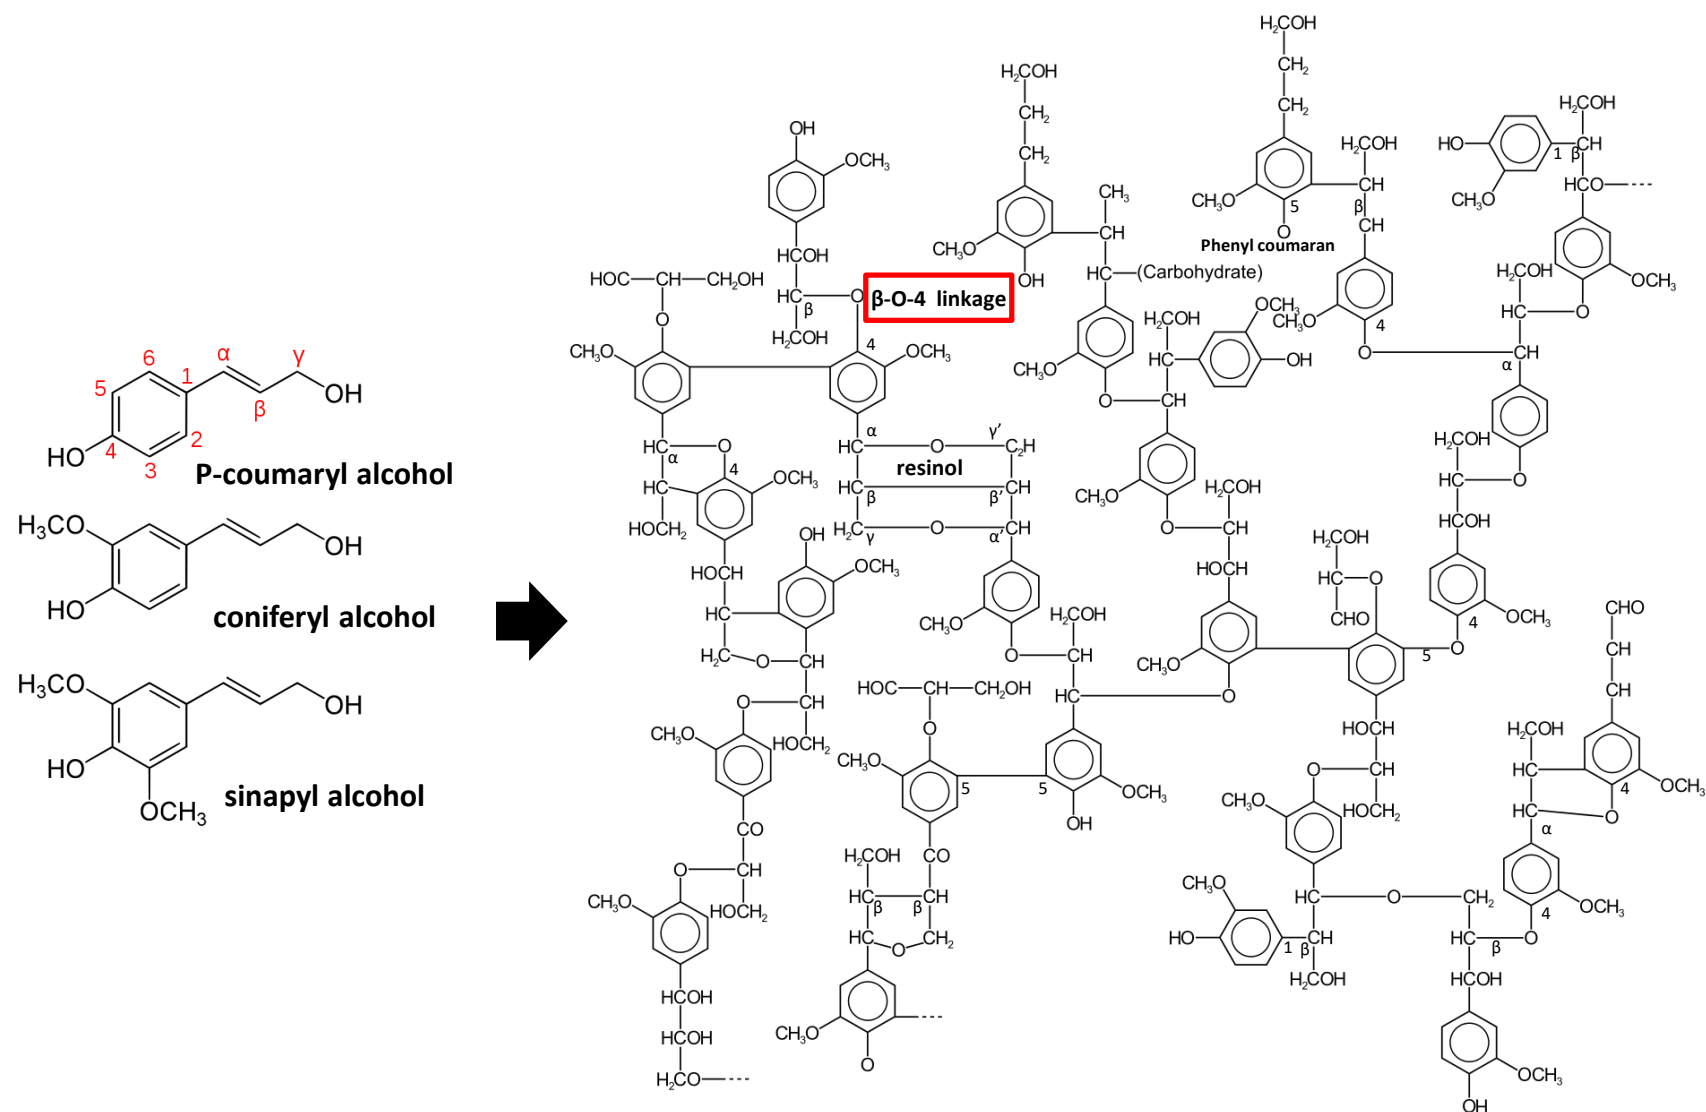

**Figure S3. Lignin structure.** Three building blocks of lignin or monolignols (coniferyl, sinapyl, and p-coumaryl alcohols; public domain image, courtesy of Chino) and hypothetical structure of lignin (adapted from public domain image). The different types of linkages are indicated and the main structures identified in MG lignin specified in bold characters. The  $\beta$ -O-4 linkage attacked by *P. anserina* is boxed.
