# Supplementary material for: Lignin Degradation and Its Use in Signaling Development by the Coprophilous Ascomycete Podospora anserina
Source: MDPI journal article supplement (doi:10.3390/jof6040278), 2020-11-11
Supplement: s1 [file s1]

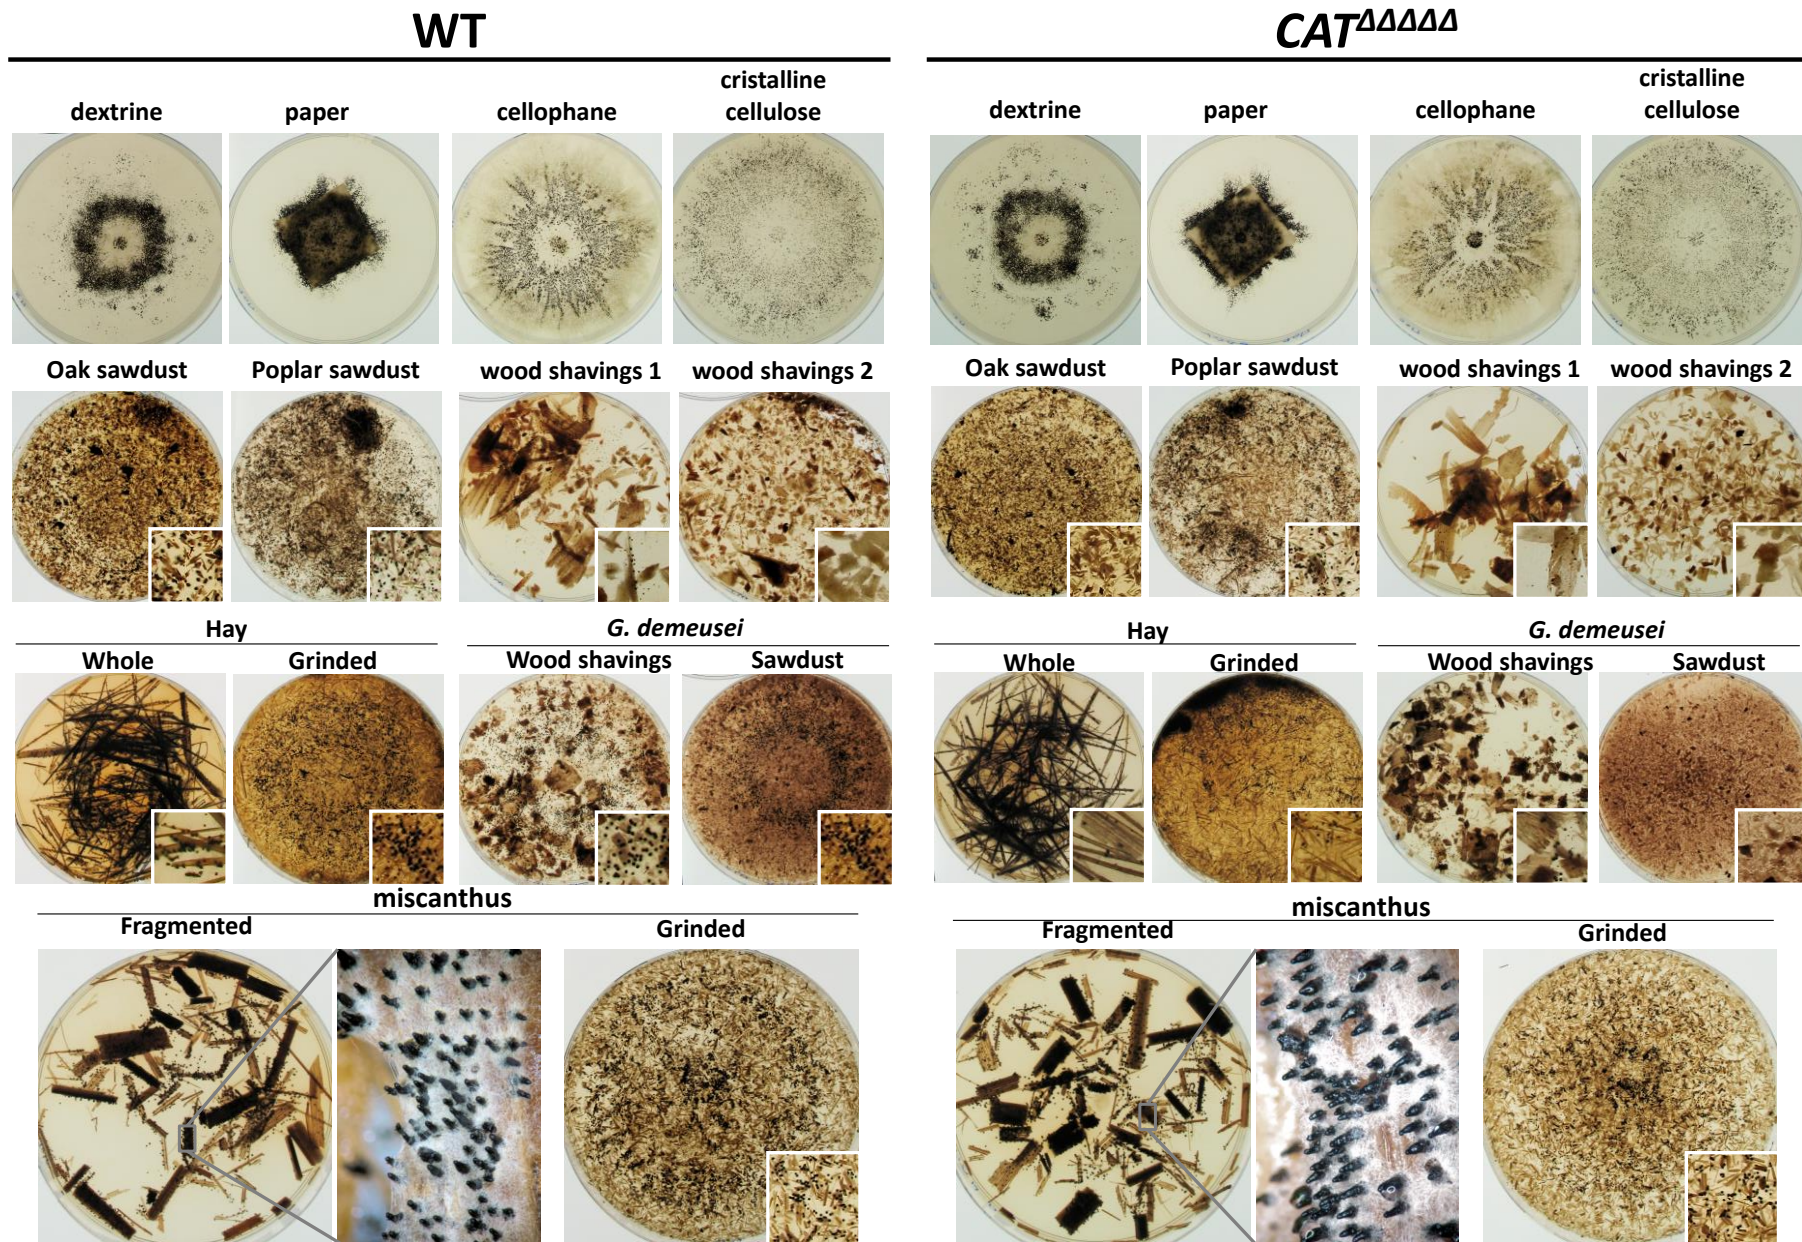

**Figure S2. Fertility of *P. anserina* on various lignocelluloses.** Ø=8 cm-Petri plates containing M2, M4 and 15 mL of jellified M0 medium supplemented with the indicated carbon sources were inoculated with similar amounts of *mat*<sup>+</sup>/*mat*<sup>-</sup> heterokaryotic mycelia from the *P. anserina* S (WT) and CAT<sup>ΔΔΔΔ</sup> strain and incubated for two weeks, at which time the pictures were taken. The fruiting bodies appear as small black dots (enlarged in the insets).
