# Supplementary material for: Lignin Degradation and Its Use in Signaling Development by the Coprophilous Ascomycete Podospora anserina
Source: MDPI journal article supplement (doi:10.3390/jof6040278), 2020-11-11
Supplement: s1 [file s1]

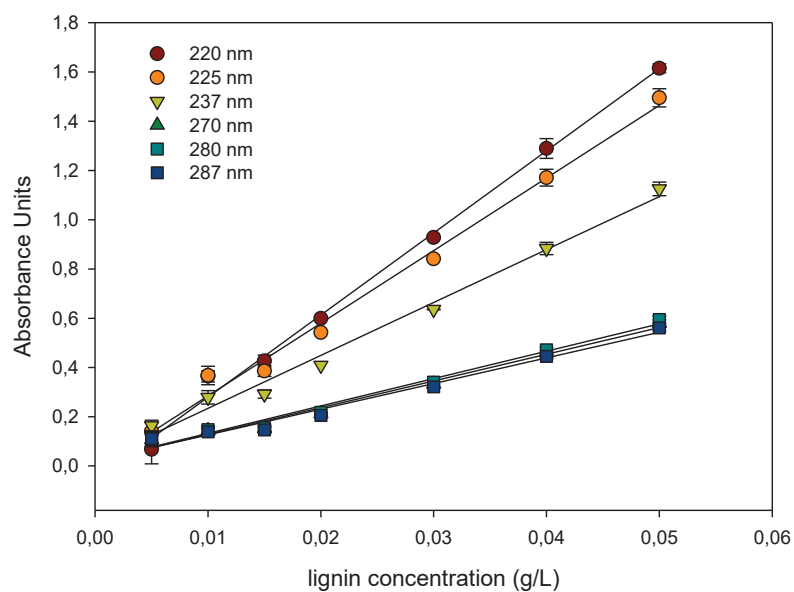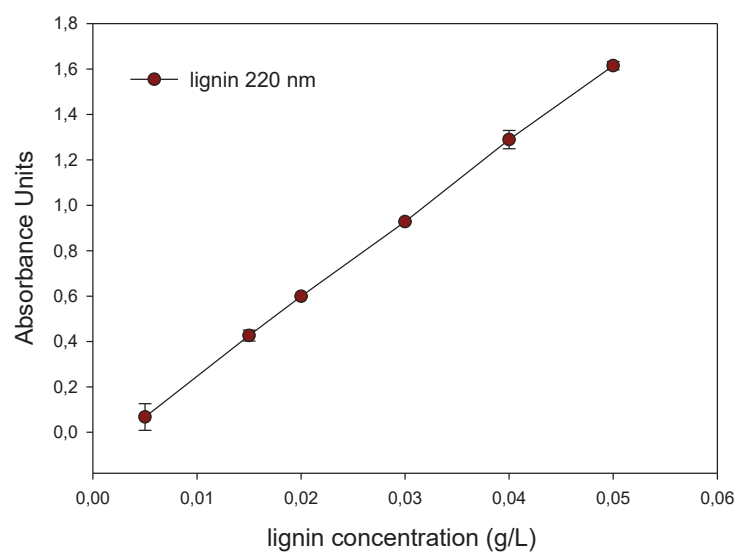

**Figure S1:** Calibration curves for the chosen wavelengths (225, 237, 270 and 280nm) are shown for the same concentration of lignin (0.02 g/L) (Sigma ref 471003, MW ~10 000 Da). Based on the experimental data of Lee et al., (2013), calibration graphs were plotted for bands at  $\lambda$  max = 220, 237, 270 and 280 nm (Fig. 6). The graphs indicate that the absorbance is a linear function of lignin concentration for all of the bands.

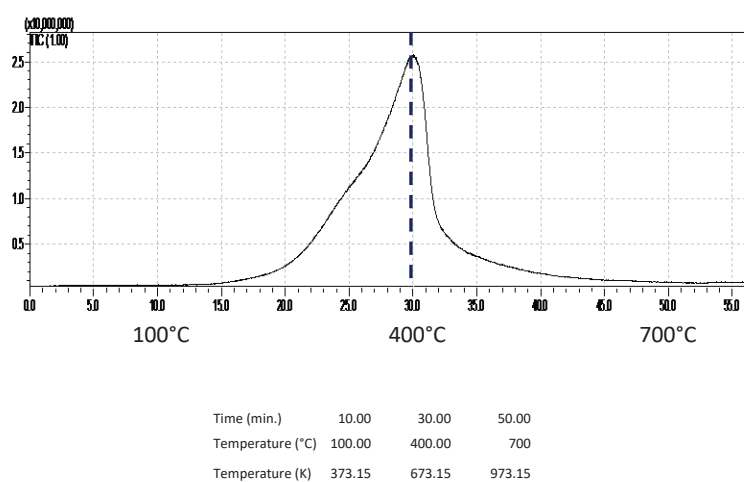

**Figure S2: Optimal temperature determination for Py-GC/MS.**
